# Supplementary material for: Theoretical prediction of two-dimensional ferromagnetic Mn2X2 (X = As, Sb) with strain-controlled magnetocrystalline anisotropy
Source: Royal Society of Chemistry journal article supplement (doi:10.1039/d3cp03691j), 2023-12-13
Supplement: d3cp03691j1.pdf [file d3cp03691j1.pdf]

*Electronic Supplementary Information for*

**Theoretical prediction of two-dimensional ferromagnetic  $Mn_2X_2$  ( $X=As, Sb$ ) with strain-controlled magnetocrystalline anisotropy**

Yi Zhao<sup>1</sup>, Zesen Lei<sup>1</sup>, Yonghao Wang<sup>1</sup>, Wei Yan<sup>1,\*</sup>, Ruishan Tan<sup>1</sup>, Tao Jing<sup>2</sup>, Qilong Sun<sup>1,†</sup>

<sup>1</sup>School of Science, Shandong Jianzhu University, Jinan, Shandong 250101, China

<sup>2</sup>College of Science, Kaili University, Kaili, Guizhou 556011, China

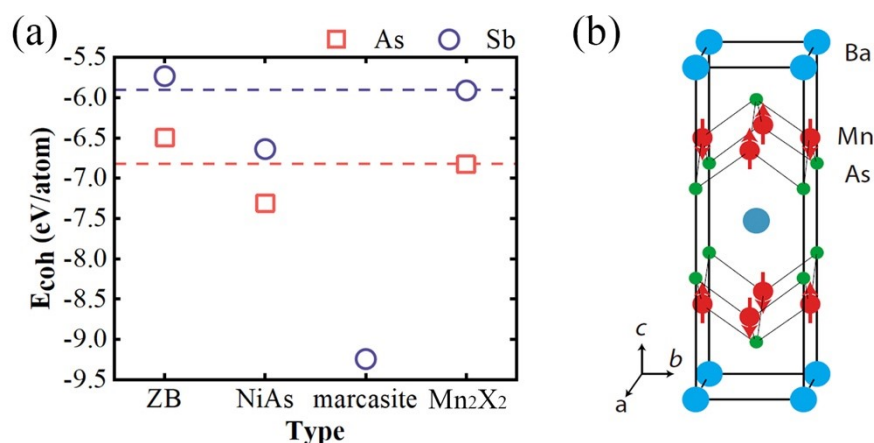

**Figure S1.** (a) Cohesive energy of different structures. The predicted  $Mn_2X_2$  in the tetragonal structures are  $BaMn_2As_2$  type. (b) The crystallographic structure of synthesized  $BaMn_2As_2$ .<sup>[40]</sup>

**Table S1.** The calculated magnetic moments of Mn ( $\mu_B$ ) for  $Mn_2X_2$  ( $X = As, Sb$ ) with HSE06 and GGA+ $U$  ( $U_{eff} = 3.5$  eV) level, respectively.

| Method   | $Mn_2As_2$ | $Mn_2Sb_2$ |
|----------|------------|------------|
| HSE06    | 3.711      | 4.103      |
| GGA+ $U$ | 3.681      | 4.095      |

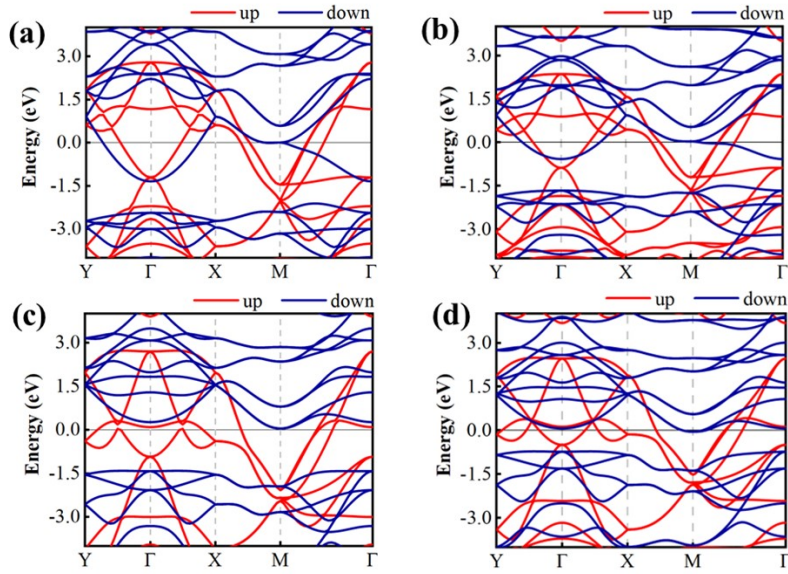

**Figure S2.** The band structures of the (a)  $\text{Mn}_2\text{As}_2$  and (c)  $\text{Mn}_2\text{Sb}_2$  using HSE06 functional and those of the (b)  $\text{Mn}_2\text{As}_2$  and (d)  $\text{Mn}_2\text{Sb}_2$  with GGA+ $U$  ( $U_{\text{eff}} = 3.5$  eV) method.

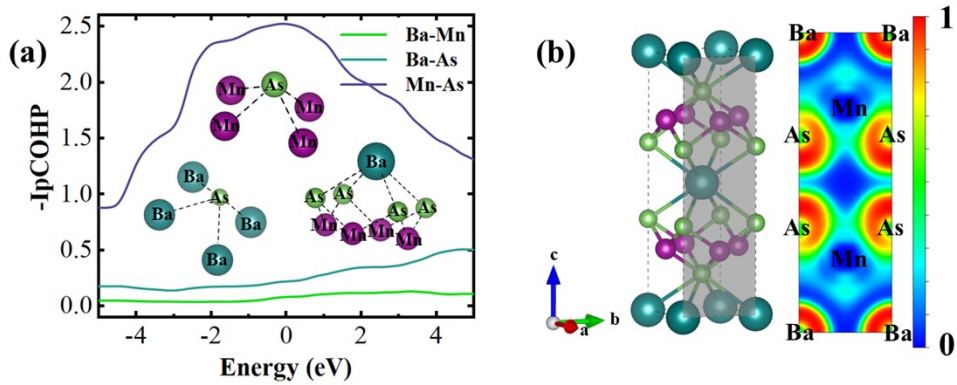

**Figure S3.** (a) Integrated projected crystal orbital Hamilton population for Ba-As, Ba-Mn and Mn-As bonds with the corresponding structure schematics. (b) Crystal structure and projection of the electron localization function along (100) plane of  $\text{BaMn}_2\text{As}_2$ .

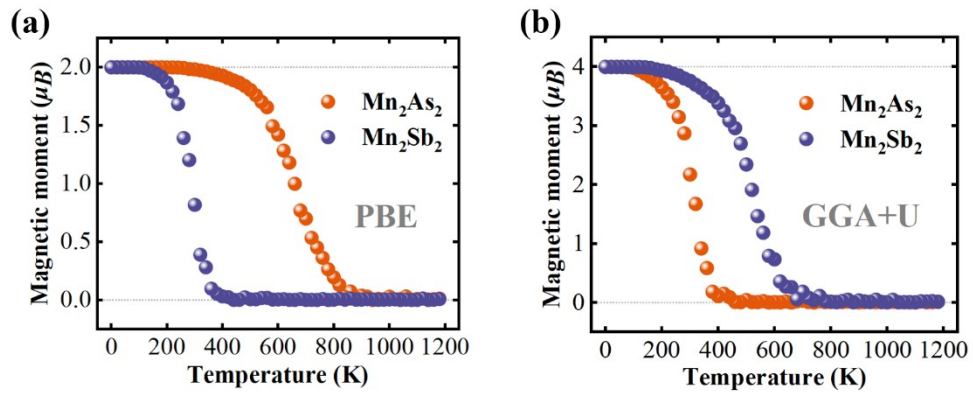

**Figure S4.** Variation of the Mn magnetic moment with respect to the temperature for the 2D  $Mn_2X_2$  in (a) PBE and (b) GGA+U level.
